# Supplementary material
Source: publisher figshare collection journal article supplement (https://springernature.figshare.com/ndownloader/files/19887536)
Supplement: Supplementary file 1 [file 19887536]

**Additional file 2**

**Interview Questions**

1. How did you view the writing skill before attending the classes?

2. What was the most challenging issue you faced while participating in the classes?

3. What was the most interesting/encouraging point of the classes?

4. Can you talk about your learning experience through the reader-response approach?
